# Supplementary material for: Identification, expression, and functional analysis of Hsf and Hsp20 gene families in Brachypodium distachyon under heat stress
Source: PeerJ. 2021 Oct 1;9:e12267. doi: 10.7717/peerj.12267 (PMC8489411; doi:10.7717/peerj.12267)
Supplement: Supplemental Information 8 [file peerj-09-12267-s008.xls]

## Sheet: Hsp20
Gene Name	ABRE	AuxRR-core	ERE	LTR	HSE	TCA-element1	TGA-element	P-box	CGTCA-motif	ARE	TC-rich repeats	TATC-box	TCA-element2	MBS	GARE-motif	CEI	motif IIb
BdHsp16.8-CIV	587 + 1348 + 728 +	1360 -	1185 +	/	1244 +	1045 -	505 -	/	598 +	80 + 831 + 347 +	/	/	/	716 -	/	/	/
BdHsp15.8-PX	/	/	/	751 + 1379 - 872 + 1460 +	1387 +	/	/	1428 -	490 + 927 + 679 + 1174 -	2 2 -	862 +	/	/	/	/	/	/
BdHsp17.3-CI	/	/	697 -	1084 -	362 +	/	/	621 + 793 -	/	572 + 737 -	/	524 -	292 - 1135 + 1036 -	1096 - 1363 -	/	/	/
BdHsp16.9-CI	436 +	469 -	/	1048 -	/	/	44 + 653 +	/	856 -	/	785 -	/	/	/	/	/	/
BdHsp17.6-CI	1127 -	/	/	/	/	/	556 -	/	1345 +	1174 +	/	/	/	93 - 1449 - 1219 - 1485 +	580 +	/	/
BdHsp18.7-CI	202 + 1048 - 822 - 1061 + 392 - 1058 - 919 + 1282 + 323 - 1057 - 915 + 1060 + 820 - 921 +	952 +	/	/	/	/	3 -	/	779 - 1436 - 1089 -	/	/	/	/	352 - 459 -	163 -	651 -	/
BdHsp17.2A-CI	/	/	/	/	/	/	/	/	/	/	/	/	/	/	/	/	/
BdHsp17.2B-CI	/	/	/	/	/	/	/	/	/	/	/	/	/	/	/	/	/
BdHsp18.0-CII	/	/	/	/	/	/	/	/	38 +	/	/	/	/	/	/	/	/
BdHsp16.4-CI	473 - 793 - 475 +	/	646 -	1424 +	/	/	/	/	/	29 -	/	/	/	836 -	/	/	/
BdHsp20.5-ER	198 + 1442 + 325 +	/	158 + 542 - 229 +	/	/	/	260 + 1068 - 929 - 779 - 995 -	/	/	510 - 1136 - 1115 - 1277 -	/	/	/	1030 -	/	/	/
BdHsp22.0-ER	/	/	/	/	/	372 -	/	/	30 +	/	/	/	/	/	58 - 297 -	/	/
BdHsp24.2-ER	247 - 469 + 249 +	/	115 + 704 -	351 - 1377 +	696 - 1335 -	751 + 1032 -	/	/	45 + 1495 + 1353 +	36 - 318 +	/	/	/	/	940 + 1047 -	/	/
BdHsp18.3-CIII	/	/	/	616 +	531 +	/	/	/	/	237 +	/	/	/	872 +	283 +	/	/
BdHsp26.4-CP	/	48 +	/	/	893 -	/	/	/	/	/	/	/	/	35 -	454 -	/	/
BdHsp23.2-M	/	/	/	/	/	/	/	/	/	110 +	/	/	/	/	/	/	/
BdHsp21.0-CV	866 - 1309 -	/	/	/	804 -	329 + 818 - 557 -	/	/	/	250 - 1475 - 906 + 664 + 1160 -	360 + 1002 +	/	/	189 - 716 + 308 + 1384 +	1126 -	/	709 -
BdHsp40.0-M	/	/	/	/	/	/	/	/	/	/	/	/	/	/	/	/	/
HSE: heat stress responsiveness
TC-rich repeats: defense and stress responsivenes
AuxRR-core: cis-acting regulatory element involved in auxin responsiveness
motif Iib: abscisic acid responsive element
TCA-element1: salicylic acid responsiveness
ERE: ethylene-responsive element
ABRE: abscisic acid responsiveness
TGA-element: auxin-responsive element
TCA-element2: cis-acting element involved in salicylic acid responsiveness
CE I: cis-acting element associated to ABRE, involved in ABA responsiveness
TATC-box: cis-acting element involved in gibberellin-responsiveness
P-box: gibberellin-responsive element
ARE: the anaerobic induction
GARE-motif: gibberellin-responsive element
CGTCA-motif: cis-acting regulatory element involved in the MeJA-responsiveness
MBS: MYB binding site involved in drought-inducibility
G-Box: cis-acting regulatory element involved in light responsiveness
LTR: low-temperature responsivenes

## Sheet: Hsf
Gene Name	Locus ID	ABRE	AuxRR-core	ERE	LTR	HSE	TCA-element1	TGA-element	P-box	CGTCA-motif	ARE	TC-rich repeats	TATC-box	TCA-element2	MBS	GARE-motif	CEI	motif IIb	G-Box
BdHsfA1a	Bradi1g01130	768 1099 972 1211	/	/	561 957 579	/	227 1040 623 258 848	972 1209	/	976 1209	34 842 726 1082	/	/	/	222 1358	/	/	/	575 1099 768 1210 767 1209 974 1237 766 768
BdHsfA2a	Bradi1g37720	365	/	/	/	/	/	911	/	/	1315	/	/	/	1088	215	/	/	365 592 365 592
BdHsfA2b	Bradi2g41530	169 840 441 1348 181 1346 444 1349 179 1306 437 1347	/	/	/	/	1077	/	262 780	/	6 671 368 1159	673 1188	/	/	153 450 409 1238	714	/	/	169 1054 437 1348 181 1306 840 168 948 443 1345 436 1305 840 1348 180 1054 646 1347 437 1306 877 169 181
BdHsfA3a	Bradi3g44700	1492	284	/	/	/	/	/	/	395 1165	930 937	103		27 1006 354	607	720			375 1489 744 1491
BdHsfA4a	Bradi2g49860	/	/	/	259	535 791 598	/	/	99	940 1483	243 1034 815 1098 497 914	/	/	1018	/	1339	/	/	247
BdHsfA5a	Bradi2g18980	859 1003 1001	88	/	588	/	/	584 1105	/	1143 1386 1155	/	/	/	29	611 1184	919 940	/	/	859 1003 97 1003 858 1247 623 1245 859
BdHsfA5b	Bradi3g43710	252 892	/	/	/	882	/	816	/	821	1485 1490	513 879	/	274	1134 1335	1462	/	/	892 254 892
BdHsfA6a	Bradi1g08891	/	/	695	/	/	/	/	/	147 979 324 997	/	/	/	/	377 635	/	/	/	1049
BdHsfA6b	Bradi1g74350	/	/	/	/	/	/	/	/	/	/	320	/	/	269	/	/	/	/
BdHsfA6c	Bradi3g26920	667	/	942	/	856	119 387 269	/	747	819	140	121	/	/	/	/	/	/	667 667
BdHsfA7a	Bradi1g05550	262 264	/	/	/	/	/	/	/	/	/	/	/	/	115	/	/	/	264 263 264
BdHsfA7b	Bradi1g55630	461 1376 677 1378 463 1078	/	/	/	/	/	803	/	207 437	385 500	160	/	/	236 948 815 1390	/	/	/	463 1378 677 421 1375 677 1378 461 1376
BdHsfA8a	Bradi1g69407	408 861 859	/	/	/	/	803	1033	/	459 1289 1106 1476 1024 1416 1138	379 1378 1196	/	/	/	9 983	628	/	/	608 957 861 1119 608 959 861 1119
BdHsfB1a	Bradi4g32130	291 1408 1030	1392	/	/	1271	838	/	/	156 1108 179 1310	/	17	/	/	607	/	/	/	291 1030 460 1305 177 1305 462 291 1030
BdHsfB2a	Bradi3g42130	1134 1248	/	/	248 1354 863	1293	214 824 764	1434	/	426 1222 982	935 1211	/	/	/	/	/	/	/	1134 1250 110 1250 1134
BdHsfB2b	Bradi4g35780	/				1169	407			1129		655			285 1026			1377	274 1132 276
BdHsfB3a	Bradi5g18680	138 139	/	/	/	117	150 153	/	/	/	261	/	/	/	314	/	/	/	138 135 137 136 138
BdHsfB4a	Bradi1g19900	922	/	/	917	/	/	694 989	504 1217	140 1081	227 902	/	/	/	160	/	/	/	59 924 681
BdHsfB4b	Bradi1g61620	/	/	/	/	913	43 359 103	1099	/	1135	1031	/	/	/	1318	/	/	/	1446 454 1360 1027
BdHsfB4c	Bradi4g32050	467 1011 469 1096	/	/	793 1312 967	/	219 321	1003	78 323	507 1015 744	263	286 356	/	/	955 1148	/	/	/	469 1096 1011 467 1011 469 1034 468 1016 550 1096
BdHsfC1a	Bradi2g44050	/	/	/	/	/	420	909	1333	912	467 1112	/	/	/	410 1249 1117	444 1298 655	/	/	1007 395 1007 812 1474
BdHsfC1b	Bradi2g48990	3 1279 1277 1280 1265 1278	/	/	839	/	673 1154	946	/	75 1343 961 101 1009	/	1034	/	/	19	/	/	606	636 1279 1276 1405 887 1341 1278
BdHsfC2a	Bradi1G38140	922 1366 1242 1212 1323				395	337 741 729 1225		1069 1278	660 1394 1043 1439	901				135 897				48 1322 924 1487 200 1380 957 1323 103 1437 811
BdHsfC2b	Bradi3G08870	192	/	/	96	/	/	39	/	/	/	/	/	/	/	/	/	/	/
HSE: heat stress responsiveness
TC-rich repeats: defense and stress responsivenes
AuxRR-core: cis-acting regulatory element involved in auxin responsiveness
motif Iib: abscisic acid responsive element
TCA-element1: salicylic acid responsiveness
ERE: ethylene-responsive element
ABRE: abscisic acid responsiveness
TGA-element: auxin-responsive element
TCA-element2: cis-acting element involved in salicylic acid responsiveness
CE I: cis-acting element associated to ABRE, involved in ABA responsiveness
TATC-box: cis-acting element involved in gibberellin-responsiveness
P-box: gibberellin-responsive element
ARE: the anaerobic induction
GARE-motif: gibberellin-responsive element
CGTCA-motif: cis-acting regulatory element involved in the MeJA-responsiveness
MBS: MYB binding site involved in drought-inducibility
G-Box: cis-acting regulatory element involved in light responsiveness
LTR: low-temperature responsivenes
