# Supplementary material for: Identification, expression, and functional analysis of Hsf and Hsp20 gene families in Brachypodium distachyon under heat stress
Source: PeerJ. 2021 Oct 1;9:e12267. doi: 10.7717/peerj.12267 (PMC8489411; doi:10.7717/peerj.12267)
Supplement: Supplemental Information 9 [file peerj-09-12267-s009.xlsx]

## Sheet: BdHsp20
name	Dark 1h			Dark 3h			Dark 6h			Dark 12h			Dark 24h
	fold-change	p-value	down/up	fold-change	p-value	down/up	fold-change	p-value	down/up	fold-change	p-value	down/up	fold-change	p-value	down/up
BdHsp16.8-CIV	1.40313	0.0160251		2.83631	2.27805e-05	UP	1.74358	0.000135503		1.34255	0.0304214		0.513193	0.00186098
BdHsp15.8-PX	6.11878	0.000997938	UP	7.91051	2.36039e-05	UP	0.243607	9.15044e-06	down	0.208132	1.94645e-05	down	0.387171	6.08326e-05	down
BdHsp17.3-CI	15.2782	2.1398e-05	UP	14.8638	1.87983e-05	UP	0.260755	0.00134143	down	0.290844	0.00158099	down	0.304298	0.000271614	down
BdHsp16.9-CI	14.6525	0.000226769	UP	20.2309	2.98898e-05	UP	0.972477	0.853955		0.964283	0.857864		1.05175	0.777223
BdHsp17.6-CI	5.57699	0.000452024	UP	7.14559	1.45083e-05	UP	4.86507	0.000264884	UP	1.19088	0.519996		1.53864	0.153307
BdHsp18.7-CI	2.48119	0.0132466	UP	1.55911	0.556533		0.993908	0.967887		0.885425	0.587576		1.27332	0.233491
BdHsp17.2A-CI	24.6535	5.21415e-06	UP	39.3704	2.41595e-06	UP	0.183856	3.48115e-06	down	4.19688	0.0913214		2.36339	0.0795441
BdHsp17.2B-CI	24.6871	6.13521e-07	UP	41.3914	1.42332e-07	UP	0.30831	3.56276e-05	down	7.26842	0.000110505	UP	0.686404	0.0148786
BdHsp18-CII	8.43237	6.29565e-06	UP	7.16649	2.02125e-06	UP	0.597293	0.000366723		0.0993201	1.12262e-05	down	0.259011	0.00755557	down
BdHsp16.4-CI	22.6858	3.03963e-08	UP	25.3621	9.31762e-08	UP	0.936654	0.126911		1.8145	0.00116396		2.62431	8.02938e-05	UP
BdHsp20.5-ER	2.10375	0.000164116	UP	1.54269	0.0020789		0.249995	0.00812244	down	0.389852	0.000227609	down	0.797409	0.0293577
BdHsp22-ER	1.55704	0.072911		2.2541	0.0111458	UP	0.5686	0.26056		2.35007	0.00514642	UP	1.80443	0.0191768
BdHsp24.2-ER	30.4022	1.75009e-05	UP	33.4772	2.41126e-05	UP	0.0949876	5.83426e-06	down	0.0756651	5.47415e-06	down	0.0891331	0.00261479	down
BdHsp18.3-CIII	4.84386	0.000164805	UP	3.57551	0.000638359	UP	0.0450189	3.30644e-06	down	0.0176163	1.33403e-05	down	0.179718	0.000308696	down
BdHsp26.4-CP	21.4187	0.000183239	UP	25.9518	1.54333e-06	UP	0.0758961	1.00759e-05	down	0.212075	4.64164e-05	down	0.227536	0.00595845	down
BdHsp23.2-M	144.419	0.0021555	UP	1495.02	1.13666e-07	UP	0.0237907	1.06324e-06	down	0.120914	1.42847e-05	down	0.146209	3.62206e-05	down
BdHsp21.0-CV	2.15736	0.00522399	UP	6.70794	0.000299307	UP	0.746679	0.25292		0.98334	0.968762		0.492097	0.100083
BdHsp40.0-M	0.19364	0.00310622	down	0.357552	0.0156163	down	11.9464	0.00154135	UP	17.8686	0.000427626	UP	13.8795	0.00743608	UP
name	heat 1h			heat 3h			heat 6h			heat 12h			heat 24h
	fold-change	p-value	down/up	fold-change	p-value	down/up	fold-change	p-value	down/up	fold-change	p-value	down/up	fold-change	p-value	down/up
BdHsp16.8-CIV	0.214751	4.4849e-06	down	3.00763	0.000184302	UP	10.5031	4.23177e-07	UP	2.5033	2.11204e-05	UP	2.02948	0.000525212	UP
BdHsp15.8-PX	4762.05	5.02309e-09	UP	3243.26	7.03899e-09	UP	1727.84	1.68608e-08	UP	323.801	2.06033e-08	UP	307.887	8.99534e-08	UP
BdHsp17.3-CI	11942	9.12558e-08	UP	14728.5	5.75079e-08	UP	9145.44	7.76417e-08	UP	1569.16	4.54847e-07	UP	1017.24	1.69316e-05	UP
BdHsp16.9-CI	12607.4	4.62509e-07	UP	33030	2.41273e-07	UP	22834.1	2.56203e-07	UP	3236.5	1.18298e-06	UP	2613.14	2.49136e-06	UP
BdHsp17.6-CI	1573.97	7.4377e-08	UP	3506.09	5.87577e-08	UP	2565.86	6.44788e-09	UP	1148.66	9.61566e-08	UP	758.241	1.07476e-08	UP
BdHsp18.7-CI	0.679536	0.0687319		0.526135	0.0286507		1.15679	0.376107		0.985053	0.673124		1.97226	0.00202857
BdHsp17.2A-CI	17233.7	1.47852e-08	UP	45243	6.14957e-09	UP	25717.3	2.99731e-09	UP	4689.84	1.5216e-08	UP	5498.6	4.66665e-09	UP
BdHsp17.2B-CI	21404.9	1.0153e-08	UP	107875	4.80867e-09	UP	106130	7.1515e-09	UP	18087.4	6.74181e-08	UP	14743.9	5.56943e-09	UP
BdHsp18-CII	5370.57	2.62474e-08	UP	5096.81	8.74643e-09	UP	2462.05	3.51402e-07	UP	558.472	4.2775e-08	UP	627.545	1.78566e-08	UP
BdHsp16.4-CI	18882.8	2.7445e-07	UP	32131.1	9.90132e-09	UP	14105.6	1.27356e-09	UP	2286.22	3.70391e-09	UP	1530.37	1.30713e-08	UP
BdHsp20.5-ER	2.5751	0.000211505	UP	1.99125	0.00409894		5.01883	5.97029e-06	UP	1.28985	0.00859804		0.896782	0.447982
BdHsp22-ER	106.519	1.87495e-05	UP	141.513	6.53082e-06	UP	61.0455	1.32287e-05	UP	14.3764	0.000234877	UP	15.0895	0.000228262	UP
BdHsp24.2-ER	19647.1	2.22904e-09	UP	60143	1.66076e-09	UP	37853.7	2.68074e-09	UP	4581.34	8.17882e-08	UP	4225.32	1.40086e-08	UP
BdHsp18.3-CIII	2309.72	3.14483e-07	UP	1427.63	1.04128e-08	UP	647.402	1.50159e-08	UP	121.789	9.88774e-06	UP	139.924	5.94192e-07	UP
BdHsp26.4-CP	16488.4	2.54612e-08	UP	52297.2	1.40312e-08	UP	45410.7	1.94589e-08	UP	10616.8	2.76833e-08	UP	4265.63	6.71397e-08	UP
BdHsp23.2-M	158372	6.31273e-08	UP	174084	2.81153e-06	UP	178619	1.24479e-07	UP	91796.9	4.24413e-08	UP	80796.4	9.46134e-05	UP
BdHsp21.0-CV	1.94968	0.0137278		6.57334	0.000269688	UP	11.1813	0.00013653	UP	2.49102	0.00419117	UP	1.46559	0.0971295
BdHsp40.0-M	0.000242081	5.15113e-06	down	0.000826995	9.45624e-06	down	0.00170376	1.65362e-05	down	0.00717976	3.69259e-05	down	0.0246538	0.000824526	down
name	ABA 1h			ABA 3h			ABA 6h			ABA 12h			ABA 24h
	fold-change	p-value	down/up	fold-change	p-value	down/up	fold-change	p-value	down/up	fold-change	p-value	down/up	fold-change	p-value	down/up
BdHsp16.8-CIV	1.33711	0.178026		0.366138	0.000447118	down	0.543924	0.00386365		0.0282062	2.42107e-05	down	0.12001	2.7396e-05	down
BdHsp15.8-PX	0.149892	4.05841e-05	down	0.174969	5.50442e-05	down	0.0425709	2.51983e-06	down	0.0841816	9.8435e-06	down	0.146571	0.000112451	down
BdHsp17.3-CI	0.481424	0.00909024	down	0.468725	0.00379089	down	0.370969	0.00302301	down	0.420377	0.00417225	down	0.761685	0.0856243
BdHsp16.9-CI	1.8407	0.0109692		0.857246	0.238778		0.805724	0.192813		2.31872	0.00768866	UP	5.24525	0.000119153	UP
BdHsp17.6-CI	0.155957	7.77119e-05	down	0.117654	1.85619e-05	down	0.115429	0.000143204	down	0.0513237	9.54694e-06	down	0.0581888	1.65831e-06	down
BdHsp18.7-CI	1.4561	0.346185		0.305908	0.0248627	down	0.203691	0.0105977	down	0.120583	0.00347491	down	0.225297	0.0126432	down
BdHsp17.2A-CI	1.00198	0.995728		0.994469	0.988071		0.571428	0.210005		1.5243	0.302397		1.02693	0.94191
BdHsp17.2B-CI	0.614074	0.0789504		0.226717	0.00266871	down	0.113081	0.000918109	down	0.510965	0.0461816		0.248666	0.00279776	down
BdHsp18-CII	0.105152	5.90434e-05	down	0.108307	9.74465e-05	down	0.0344182	3.37249e-05	down	0.0774048	0.000171577	down	0.0787202	2.50448e-05	down
BdHsp16.4-CI	0.458332	0.0140086	down	0.397639	0.00123075	down	0.217933	0.00104453	down	0.727344	0.0600651		0.233027	0.00024129	down
BdHsp20.5-ER	0.757131	0.0399466		0.0836023	2.65078e-05	down	0.0614582	3.42072e-05	down	0.157475	0.00014602	down	0.145121	0.00087597	down
BdHsp22-ER	0.423993	0.00166325	down	0.13572	0.000128988	down	0.198562	0.000218359	down	0.237575	3.75377e-05	down	0.268815	0.000104676	down
BdHsp24.2-ER	0.779635	0.171749		0.125005	7.88934e-05	down	0.139199	0.00990925	down	0.126876	0.00050678	down	0.113062	0.000256703	down
BdHsp18.3-CIII	1.38004	0.0803228		0.400564	0.00483132	down	0.179728	0.00024944	down	0.417992	0.00865084	down	1.37296	0.175965
BdHsp26.4-CP	0.416094	0.0224695	down	0.052221	6.22574e-06	down	0.021633	4.007e-06	down	0.0914342	6.1989e-06	down	0.0742266	0.000445135	down
BdHsp23.2-M	0.891556	0.714879		0.6906	0.0902201		0.0174096	3.61033e-06	down	0.00752639	8.48184e-06	down	0.112972	0.000113752	down
BdHsp21.0-CV	0.363562	0.0793451		0.0558863	0.00173577	down	0.130514	0.00470369	down	0.00365371	0.000107248	down	0.0636165	0.00302686	down
BdHsp40.0-M	0.300915	0.000821114	down	0.0405242	0.00056188	down	0.158399	0.00277739	down	0.0855246	8.42114e-05	down	0.163329	0.000444525	down
name	UV 1h			UV 3h			UV 6h			UV 12h			UV 24h
	fold-change	p-value	down/up	fold-change	p-value	down/up	fold-change	p-value	down/up	fold-change	p-value	down/up	fold-change	p-value	down/up
BdHsp16.8-CIV	0.659323	0.271612		0.382298	0.0151311	down	0.400362	0.0189006	down	0.351434	0.016469	down	0.922454	0.476384
BdHsp15.8-PX	0.127556	0.000169318	down	0.214456	0.000288664	down	0.113959	6.86394e-06	down	0.0385115	3.30509e-06	down	0.114257	1.2027e-05	down
BdHsp17.3-CI	0.635857	0.196877		0.490134	0.0040782	down	0.331431	0.00133902	down	0.235076	0.000443953	down	0.437832	0.00886522	down
BdHsp16.9-CI	0.970354	0.843813		0.400305	0.002205	down	0.512447	0.00449879		0.342332	0.00200189	down	0.753546	0.0638773
BdHsp17.6-CI	0.413878	0.00466854	down	0.182805	0.000107837	down	0.192985	1.4154e-05	down	0.0375634	1.45598e-06	down	0.0320711	4.87733e-06	down
BdHsp18.7-CI	0.821017	0.55918		0.234026	0.00491468	down	0.402719	0.028267	down	0.346922	0.0216435	down	0.683684	0.24577
BdHsp17.2A-CI	2.62763	0.050793		0.346902	0.0378466	down	0.348068	0.0392545	down	0.631972	0.256772		0.62346	0.23646
BdHsp17.2B-CI	0.987136	0.961743		0.306312	0.00770769	down	0.152033	0.00108118	down	0.907668	0.663813		0.44566	0.0180993	down
BdHsp18-CII	0.206261	0.000651083	down	0.148503	0.000262752	down	0.107545	3.49163e-05	down	0.0259497	7.86451e-06	down	0.0106709	5.66994e-05	down
BdHsp16.4-CI	0.767861	0.219081		0.60801	0.0133844		0.567315	0.0101021		0.355956	0.000646616	down	1.25867	0.0940308
BdHsp20.5-ER	0.483314	0.00612931	down	0.176017	0.000193362	down	0.04004	4.89897e-06	down	0.0367765	0.00018049	down	0.291695	0.00179691	down
BdHsp22-ER	1.54544	0.218304		0.82496	0.455979		2.14338	0.0715537		0.686334	0.0236059		0.671106	0.0946386
BdHsp24.2-ER	0.598507	0.12374		0.862895	0.309615		0.0614674	0.000417617	down	0.0412217	8.81797e-05	down	0.316761	0.00194335	down
BdHsp18.3-CIII	0.366602	0.048543	down	0.670171	0.11722		0.243672	0.00216516	down	0.0743705	0.00147732	down	0.118798	0.000110211	down
BdHsp26.4-CP	0.875725	0.686072		0.192644	5.29991e-05	down	0.230248	0.00263869	down	0.0534388	0.000755904	down	0.190379	0.00104864	down
BdHsp23.2-M	0.757635	0.503329		0.349443	0.0018325	down	0.448884	0.0129621	down	0.532107	0.0413773		1.26951	0.129481
BdHsp21.0-CV	0.747675	0.508096		0.415614	0.0878887		0.119566	0.00407039	down	0.0712891	0.00884419	down	0.11218	0.00490861	down
BdHsp40.0-M	0.606035	0.0314856		0.336877	0.00176441	down	0.187015	0.000638645	down	0.215362	0.000700745	down	0.675975	0.0264996
name	Cdcl2 3h			Cdcl2 6h			PEG 3h			PEG 6h
	fold-change	p-value	down/up	fold-change	p-value	down/up	fold-change	p-value	down/up	fold-change	p-value	down/up
BdHsp16.8-CIV	1.58705	0.0218104		0.547471	0.010267		1.25004	0.193796		0.240204	0.000565301	down
BdHsp15.8-PX	2.09779	0.0170827	UP	2.84377	0.00242678	UP	1.36938	0.19844		1.19391	0.444895
BdHsp17.3-CI	21.3811	0.000136826	UP	26.1527	0.000108896	UP	4.15537	0.00413709	UP	3.22115	0.00960629	UP
BdHsp16.9-CI	5.16827	0.0061463	UP	8.15049	0.00223514	UP	1.22964	0.560584		1.51273	0.344223
BdHsp17.6-CI	1.78463	0.0189191		1.32969	0.207424		1.32233	0.109045		1.56201	0.0413716
BdHsp18.7-CI	1.48932	0.0802435		1.04726	0.777795		2.71586	0.0152083	UP	1.75	0.0609734
BdHsp17.2A-CI	10.1152	0.000212059	UP	10.6653	0.00720751	UP	5.83309	0.0131899	UP	4.46758	0.00122805	UP
BdHsp17.2B-CI	7.97731	0.00199864	UP	17.1272	0.000139182	UP	2.79597	0.00557628	UP	4.0699	0.00283735	UP
BdHsp18-CII	8.61861	0.00019677	UP	13.1329	2.62896e-05	UP	4.13857	0.00297461	UP	5.20124	0.000212175	UP
BdHsp16.4-CI	14.9303	8.39839e-05	UP	17.8656	9.39325e-05	UP	1.1117	0.582883		0.952311	0.916039
BdHsp20.5-ER	0.304876	0.00180753	down	0.317582	0.00119466	down	0.410509	0.00346919	down	0.456171	0.0272123	down
BdHsp22-ER	0.576618	0.0884836		0.350247	0.00441606	down	0.733088	0.215339		0.153083	0.00812386	down
BdHsp24.2-ER	0.219579	0.00359043	down	0.555898	0.0721735		0.0499329	0.000757234	down	0.0662581	0.000562987	down
BdHsp18.3-CIII	28.4322	3.27672e-05	UP	37.9799	1.94517e-05	UP	18.2643	6.92544e-06	UP	13.8877	3.3525e-05	UP
BdHsp26.4-CP	1.57081	0.196348		2.05527	0.0275436	UP	0.162364	0.00502553	down	0.125717	0.000826505	down
BdHsp23.2-M	1.00744	0.975073		2.02808	0.0389134	UP	0.203901	0.00133292	down	0.209763	0.000970635	down
BdHsp21.0-CV	7.36412	0.00233089	UP	3.98851	0.00675723	UP	3.32571	0.0208499	UP	1.80518	0.0707067
BdHsp40.0-M	0.177953	0.0189547	down	0.107607	0.00753248	down	0.713498	0.504362		0.447584	0.151977

## Sheet: BdHsf
name	Dark 1h			Dark 3h			Dark 6h			Dark 12h			Dark 24h
	fold-change	p-value	up/down	fold-change	p-value	up/down	fold-change	p-value	up/down	fold-change	p-value	up/down	fold-change	up/down	down/up
BdHsfA1a	1.58425	0.0104048		4.84612	2.29627e-05	UP	5.16371	1.27207e-05		6.22451	1.06622e-05	UP	6.32554	1.45392e-05	UP
BdHsfA2a	0.0357179	4.69757e-05	down	0.192857	0.00470572	down	0.00369078	1.79398e-05	down	0.00617583	2.9137e-05	down	0.0172869	3.86406e-05	down
BdHsfA2b	1.25477	0.00105035		2.74471	1.74442e-06	UP	1.7311	0.000115894		2.08259	2.00935e-05	UP	3.17461	7.27362e-06	UP
BdHsfA3a	1.20374	0.0893581		2.23232	0.000347196	UP	2.03446	0.00416199	UP	4.8247	6.15805e-05	UP	4.28597	3.14318e-05	UP
BdHsfA4a	0.681263	0.00266944		1.02964	0.766627		0.526228	0.000531011		0.828447	0.0449647		1.1295	0.125343
BdHsfA5a	2.9816	0.000263519	UP	2.29582	0.00199332	UP	3.00858	0.000318496	UP	3.2065	0.00155121	UP	3.82583	0.000163086	UP
BdHsfA5b	1.9749	0.00905547		3.16666	1.12615e-05	UP	1.82045	0.00020747		2.671	3.05624e-05	UP	3.78265	0.000504223	UP
BdHsfA6a	10.5662	0.152162		3.89526	0.361336		1.09012	0.951122		5.15194	0.283552		6.49085	0.231318
BdHsfA6b	0.423191	5.47467e-05	down	0.610261	0.00189054		0.212527	5.34859e-05	down	0.31705	7.45002e-05	down	0.556081	0.00478791
BdHsfA6c	0.124891	3.87822e-07	down	0.233168	5.51395e-07	down	0.0629535	3.17501e-07	down	0.162663	8.04132e-08	down	0.0636254	9.70083e-05	down
BdHsfA7a	0.824215	0.156394		1.05635	0.698816		0.517768	0.00467837		0.842706	0.196804		0.75998	0.102116
BdHsfA7b	1.30012	0.0176767		2.30117	0.000744089	UP	1.59875	0.017921		2.36913	0.000466518	UP	1.70867	0.00898911
BdHsfA8a	0.376036	0.0007304	down	0.810531	0.109447		0.457579	0.00445074	down	0.998726	0.991463		0.434114	0.00222656	down
BdHsfB1a	1.06959	0.274288		1.05272	0.446189		0.886657	0.537377		1.30975	0.0185228		1.21613	0.0241532
BdHsfB2a	1.58497	0.00856634		3.83174	4.8249e-05	UP	1.6942	0.000530702		2.55256	0.00022507	UP	3.01478	8.02292e-05	UP
BdHsfB2b	0.197212	7.41491e-05	down	0.308708	0.000948499	down	0.0428784	5.47684e-06	down	0.143655	0.00110666	down	0.27941	0.000398568	down
BdHsfB3a	0.21575	4.16992e-05	down	13.9535	2.42059e-06	UP	0.0493398	5.43315e-07	down	0.0954223	2.69772e-06	down	0.15256	3.27596e-06	down
BdHsfB4a	0.902753	0.00497069		2.33275	4.33655e-07	UP	1.45312	0.0046749		2.83431	1.90391e-07	UP	2.05381	0.000559779	UP
BdHsfB4b	1.77103	0.000235784		1.88164	0.00022374		0.808901	0.0554724		1.58977	0.00206759		1.47627	0.000824684
BdHsfB4c	0.881814	0.632942		2.21808	0.0129133	UP	0.654613	0.0832904		1.7122	0.0636549		1.24718	0.352267
BdHsfC1a	0.981789	0.923333		1.60763	0.0354651		2.30551	0.00263239	UP	2.61954	0.0019543	UP	1.17623	0.379681
BdHsfC1b	3.53829	0.000707802	UP	5.74768	0.000573253	UP	4.43092	0.00225058	UP	6.56889	1.08576e-05	UP	3.71581	0.000463241	UP
BdHsfC2a	1.03389	0.341374		1.81798	0.000455346		0.578717	0.00436888		2.54067	8.11958e-06	UP	0.725181	0.000529629
BdHsfC2b	0.51326	0.000125193		1.01979	0.786384		0.408895	5.27484e-05	down	0.834892	0.0575809		0.756106	0.115074
name	heat 1h			heat 3h			heat 6h			heat 12h			heat 24h
	fold-change	p-value	up/down	fold-change	p-value	up/down	fold-change	p-value	up/down	fold-change	p-value	up/down	fold-change	p-value	up/down
BdHsfA1a	0.44443	0.00052515	down	1.13767	0.137983		1.80765	0.0310685		1.83788	0.00145323		1.14492	0.0965225
BdHsfA2a	41.7879	2.98507e-05	UP	34.9944	2.93061e-05	UP	11.1892	0.000125994	UP	6.319	0.00044646	UP	1.07722	0.670594
BdHsfA2b	0.826032	0.0172072		1.2393	0.00255878		2.69814	1.08205e-05	UP	2.42668	1.54062e-06	UP	3.4888	8.68623e-08	UP
BdHsfA3a	12.389	1.2214e-06	UP	191.523	9.1129e-08	UP	752.116	2.08264e-08	UP	736.957	2.22899e-08	UP	417.666	2.6673e-08	UP
BdHsfA4a	16.9183	1.63787e-06	UP	9.3759	2.27238e-06	UP	8.40258	3.46879e-06	UP	4.9672	1.05859e-05	UP	6.33115	4.97093e-06	UP
BdHsfA5a	1.3702	0.0363709		1.08684	0.466583		4.94082	0.000398777	UP	4.6215	0.00043215	UP	18.6061	1.51233e-05	UP
BdHsfA5b	0.83218	0.0126105		1.28299	0.178106		2.62309	0.000531154	UP	3.13999	5.83759e-05	UP	2.33667	0.00171121	UP
BdHsfA6a	1.00664	0.996255		32.7785	0.0581712		294.709	0.0127512	UP	0.00419438	0.0147898	down	0.0166151	0.0360868	down
BdHsfA6b	13.8642	6.89974e-07	UP	9.88357	1.71459e-06	UP	9.244	1.47539e-05	UP	3.44304	4.46912e-05	UP	2.61875	4.952e-05	UP
BdHsfA6c	26.8684	1.345e-07	UP	16.1218	3.50724e-08	UP	9.49209	5.97867e-08	UP	4.47144	2.90052e-07	UP	3.30077	1.11663e-05	UP
BdHsfA7a	15.0812	1.57319e-05	UP	12.2659	2.01333e-05	UP	12.6162	8.86792e-05	UP	7.11288	7.31997e-05	UP	8.79217	3.76549e-05	UP
BdHsfA7b	2.30947	0.000216357	UP	5.17086	2.43374e-05	UP	6.41803	1.24775e-05	UP	8.56279	6.55925e-06	UP	6.911	1.52278e-05	UP
BdHsfA8a	37.6196	4.50936e-06	UP	32.4056	4.21375e-06	UP	14.3728	2.18516e-05	UP	9.45266	4.69352e-05	UP	10.223	1.66229e-05	UP
BdHsfB1a	6.96076	2.33263e-06	UP	4.51459	2.09342e-05	UP	1.52624	0.00378612		2.94743	2.02518e-05	UP	3.35994	0.000263689	UP
BdHsfB2a	2.30679	8.8418e-05	UP	5.13607	0.0133569	UP	24.9396	9.28801e-07	UP	5.28822	5.79207e-05	UP	11.9189	0.000684026	UP
BdHsfB2b	31.1099	9.44226e-06	UP	30.0311	6.51789e-06	UP	10.4474	1.40379e-05	UP	4.71742	6.35594e-05	UP	5.77869	8.79829e-05	UP
BdHsfB3a	31.727	4.59782e-07	UP	13.4442	9.84299e-07	UP	7.36487	1.53083e-05	UP	3.33315	1.86508e-05	UP	1.13624	0.11507
BdHsfB4a	1.31227	0.00568983		1.80018	6.10357e-05		1.39019	0.00268054		0.981825	0.771051		0.188159	8.38736e-05	down
BdHsfB4b	5.63021	5.70327e-06	UP	1.45998	0.0043335		0.700821	0.0231598		0.517191	0.000933186		0.303861	2.70499e-05	down
BdHsfB4c	0.521686	0.0252038		0.766895	0.27673		3.93972	0.0038352	UP	0.978617	0.911105		0.756394	0.305281
BdHsfC1a	0.434245	0.00729265	down	6.31057	6.45548e-05	UP	6.64551	0.000460742	UP	8.39439	0.000114568	UP	4.00925	0.000619145	UP
BdHsfC1b	0.984924	0.892998		2.21278	0.00476205	UP	5.69288	4.0155e-05	UP	3.63344	0.00032558	UP	2.76761	0.000207063	UP
BdHsfC2a	1.82401	0.000297128		1.93292	6.57569e-05		0.554409	0.000189923		0.975717	0.512895		0.707483	0.0141576
BdHsfC2b	0.339781	8.53864e-05	down	1.00754	0.927289		3.24175	1.10216e-05	UP	2.29854	0.00044594	UP	3.40601	3.815e-06	UP
name	ABA 1h			ABA 3h			ABA 6h			ABA 12h			ABA 24h
	fold-change	p-value	up/down	fold-change	p-value	up/down	fold-change	p-value	up/down	fold-change	p-value	up/down	fold-change	p-value	up/down
BdHsfA1a	4.06865	0.0458262	UP	0.721027	0.473339		0.681723	0.360317		1.64664	0.28296		0.495894	0.145529
BdHsfA2a	0.370357	0.0458878	down	0.936416	0.802191		0.205222	0.00298272	down	0.229071	0.0111085	down	0.0275725	0.000622325	down
BdHsfA2b	4.61064	0.0126453	UP	6.84633	0.000640934	UP	14.088	0.000163023	UP	16.9331	0.000339433	UP	4.82393	0.0046022	UP
BdHsfA3a	21.8427	0.00284153	UP	4.11183	0.0241363	UP	3.01269	0.0835741		0.702151	0.437176		0.186654	0.0148245	down
BdHsfA4a	1.24232	0.709715		0.272357	0.0369879	down	0.544901	0.187259		0.575779	0.277783		0.253101	0.02474	down
BdHsfA5a	23.8052	0.00800712	UP	0.928006	0.821328		1.23437	0.534405		1.87336	0.112738		1.15687	0.679926
BdHsfA5b	257.669	0.000232249	UP	144.922	2.94394e-05	UP	244.945	3.02025e-05	UP	257.271	4.44306e-05	UP	33.9628	0.000236146	UP
BdHsfA6a	77.1173	0.00020333	UP	31.4529	0.00016068	UP	44.9759	0.000628199	UP	29.6481	0.00427968	UP	16.0368	0.000287239	UP
BdHsfA6b	0.909342	0.867239		0.113298	0.0028916	down	0.0431076	0.000942453	down	0.0323576	0.00116736	down	0.0681491	0.00186462	down
BdHsfA6c	0.85177	0.707861		1.26957	0.468272		1.11381	0.743861		0.690326	0.408366		0.330361	0.0155898	down
BdHsfA7a	0.0942317	0.00175941	down	0.0972124	0.00251779	down	0.0912264	0.00145436	down	0.325585	0.023614	down	0.103487	0.00113261	down
BdHsfA7b	2.45096	0.0850086		0.553021	0.110779		0.918934	0.801489		0.394887	0.0458531	down	0.367431	0.0272804	down
BdHsfA8a	13.1267	0.00278116	UP	1.11406	0.771296		2.25122	0.0994986		2.08263	0.160247		0.528588	0.100315
BdHsfB1a	3.03034	0.0610823		0.596618	0.242816		1.03279	0.930161		2.01885	0.128807		1.57341	0.302286
BdHsfB2a	4.3394	0.106383		0.27424	0.0588293		1.00109	0.998493		0.445711	0.232956		0.304602	0.0596662
BdHsfB2b	1.35739	0.352737		0.274276	0.0165876	down	0.300946	0.0124425	down	0.136327	0.00245284	down	0.117402	0.00144	down
BdHsfB3a	2.11073	0.178894		0.757296	0.501826		0.218688	0.02009	down	0.340441	0.0679293		0.580966	0.248556
BdHsfB4a	1.58745	0.386009		0.346877	0.0349686	down	0.279464	0.0452761	down	0.315869	0.0402166	down	0.230326	0.0136871	down
BdHsfB4b	2.42801	0.180837		0.520896	0.120042		0.506145	0.126049		0.341754	0.0327178	down	0.243378	0.0233357	down
BdHsfB4c	0.826139	0.690914		0.0635781	0.000460701	down	0.156731	0.00173543	down	0.130674	0.00171276	down	0.126219	0.00145851	down
BdHsfC1a	5.23865	0.0239917	UP	0.683934	0.303266		1.14249	0.750248		0.477317	0.0721976		0.222194	0.0200452	down
BdHsfC1b	4.74475	0.0146835	UP	1.9169	0.0887836		4.99245	0.00662328	UP	3.63297	0.0186168	UP	1.16312	0.645095
BdHsfC2a	8.54998	0.0151034	UP	1.58398	0.333239		2.75292	0.00461862	UP	7.18298	0.00100911	UP	9.71074	0.00027325	UP
BdHsfC2b	15.4158	0.00140088	UP	2.43565	0.0855814		3.86551	0.0139538	UP	4.63304	0.0174984	UP	1.83711	0.1823
name	UV 1h			UV 3h			UV 6h			UV 12h			UV 24h
	fold-change	p-value	down/up	fold-change	p-value	down/up	fold-change	p-value	down/up	fold-change	p-value	down/up	fold-change	p-value	down/up
BdHsfA1a	0.297445	0.0405023	down	0.635001	0.319656		1.52128	0.318932		2.2869	0.112339		0.743344	0.537458
BdHsfA2a	0.0787164	0.000250387	down	0.214938	0.00322524	down	0.107175	0.000387278	down	0.0270826	0.000163048	down	0.0413924	0.000130047	down
BdHsfA2b	0.305427	0.0449868	down	0.159768	0.00330571	down	0.238175	0.0018178	down	0.10851	0.000454596	down	0.724897	0.167898
BdHsfA3a	0.605146	0.337302		0.719589	0.453343		4.35522	0.0247499	UP	1.92919	0.195488		2.64077	0.0737524
BdHsfA4a	0.373796	0.0814422		0.367153	0.0582755		0.926074	0.858118		0.0980614	0.00457574	down	0.263557	0.0245414	down
BdHsfA5a	0.379051	0.105934		0.767332	0.471696		1.51536	0.26944		0.601132	0.201523		1.42969	0.317108
BdHsfA5b	162.99	5.98239e-05	UP	95.2445	4.62257e-05	UP	233.713	3.65204e-05	UP	52.2103	0.000125912	UP	92.3837	8.31419e-05	UP
BdHsfA6a	11.2274	0.00276721	UP	38.4344	0.000139904	UP	55.2037	0.000185376	UP	8.22817	0.00100134	UP	6.98293	0.000917399	UP
BdHsfA6b	0.311009	0.0713185		0.21543	0.0175782	down	0.155433	0.00573926	down	0.00975661	0.000154157	down	0.0455993	0.000891966	down
BdHsfA6c	0.124645	0.00581067	down	0.295218	0.0082907	down	0.47208	0.0422965	down	0.0352041	0.000596835	down	0.0308346	0.000371405	down
BdHsfA7a	0.11223	0.00412693	down	0.151911	0.00221787	down	0.520279	0.138615		0.0169332	0.000147355	down	0.0934287	0.000893419	down
BdHsfA7b	0.657541	0.344352		0.522806	0.0927533		1.3017	0.421604		0.24895	0.01738	down	0.645845	0.24505
BdHsfA8a	0.967554	0.938266		1.20326	0.577661		3.45359	0.0119944	UP	0.59474	0.145919		1.03118	0.922415
BdHsfB1a	0.383615	0.0923284		0.687043	0.347848		1.88936	0.129152		0.476885	0.111833		1.47465	0.316018
BdHsfB2a	0.346518	0.122132		0.315907	0.0769954		0.410581	0.144058		0.114288	0.00876223	down	0.433943	0.141917
BdHsfB2b	0.207119	0.0113084	down	0.255776	0.0370254	down	0.603434	0.150372		0.0307223	0.000327409	down	0.0490683	0.000830988	down
BdHsfB3a	0.065509	0.00254052	down	0.272837	0.0284835	down	0.25627	0.0211283	down	0.0104535	0.000240191	down	0.0729546	0.00234869	down
BdHsfB4a	0.37922	0.0873937		0.276095	0.0379263	down	0.846892	0.634493		0.236423	0.0145416	down	0.460047	0.087421
BdHsfB4b	0.580253	0.212423		0.514398	0.136344		0.878155	0.715281		0.0691339	0.00141057	down	0.566774	0.327141
BdHsfB4c	0.182333	0.00835552	down	0.182407	0.0197237	down	0.235802	0.0198625	down	0.0554959	0.000252332	down	0.331003	0.00981645	down
BdHsfC1a	0.620279	0.205862		0.486131	0.0861779		1.28622	0.382747		0.5464	0.130119		2.83211	0.0187507	UP
BdHsfC1b	0.420824	0.0717547		0.63304	0.24036		1.08226	0.796243		0.276915	0.0134944	down	0.588252	0.166845
BdHsfC2a	1.00756	0.984097		0.845049	0.471287		1.34609	0.195751		0.374856	0.032278	down	0.387699	0.00847625	down
BdHsfC2b	0.225403	0.0123004	down	0.0811473	0.00103894	down	0.0942789	0.00157921	down	0.144073	0.00488019	down	1.0165	0.958616
name	Cdcl2 3h			Cdcl2 6h			PEG 3h			PEG 6h
	fold-change	p-value	up/down	fold-change	p-value	up/down	fold-change	p-value	up/down	fold-change	p-value	up/down
BdHsfA1a	0.380469	1.08797e-05	down	0.289887	6.21179e-05	down	0.984518	0.755607		0.995222	0.95687
BdHsfA2a	5.0559	0.00240381	UP	5.62151	0.0019054	UP	0.857546	0.553916		0.231694	0.0079692	down
BdHsfA2b	0.565004	0.000389968		1.56669	0.000604548		14.0792	9.16891e-07	UP	20.356	5.91813e-07	UP
BdHsfA3a	1.05092	0.502735		1.06113	0.37122		10.4686	3.50116e-05	UP	6.28825	0.000105587	UP
BdHsfA4a	1.72918	0.00347838		1.60477	0.00254058		3.64242	0.000121089	UP	3.06057	0.000272853	UP
BdHsfA5a	0.349588	0.000134382	down	0.333971	8.22981e-05	down	1.92387	0.000383264		1.18	0.424294
BdHsfA5b	0.390197	0.00277316	down	0.314628	0.000439748	down	0.897838	0.505669		26.1736	2.01641e-05	UP
BdHsfA6a	0.120656	0.00210609	down	0.0389217	7.59158e-05	down	0.467932	0.00942583	down	0.871262	0.620427
BdHsfA6b	0.552343	0.000125737		0.174037	1.51982e-07	down	1.34282	0.0008702		0.457035	0.00154511	down
BdHsfA6c	1.83304	0.000145501		0.915134	0.0703211		2.87317	0.000311456	UP	1.01587	0.909421
BdHsfA7a	0.534307	0.00150597		0.361755	0.000217967	down	1.72928	0.00186725		1.15667	0.197445
BdHsfA7b	0.607981	0.00772397		0.437204	0.000770952	down	2.27933	0.00169826	UP	1.43679	0.0743864
BdHsfA8a	0.832567	0.111703		0.539682	0.00154597		1.44515	0.0103083		1.21572	0.325734
BdHsfB1a	2.15901	0.000271419	UP	1.13134	0.113568		4.81343	3.5418e-06	UP	2.9899	0.000236589	UP
BdHsfB2a	0.480776	0.0167209	down	0.114019	0.00446006	down	0.887748	0.750867		1.54702	0.410979
BdHsfB2b	0.965576	0.862781		2.46427	0.0316015	UP	0.812936	0.351874		3.62938	0.00284932	UP
BdHsfB3a	2.89497	0.0124545	UP	4.52145	0.00345391	UP	4.98293	0.00278765	UP	1.60429	0.219016
BdHsfB4a	0.399996	0.000186048	down	0.221797	1.81839e-05	down	1.21212	0.0365948		0.691064	0.00358438
BdHsfB4b	0.23913	9.73871e-06	down	0.141696	3.99744e-06	down	0.838289	0.0284819		0.407385	0.00224298	down
BdHsfB4c	0.450664	0.0430053	down	0.1427	0.00156575	down	4.46905	0.00544393	UP	1.21969	0.472699
BdHsfC1a	3.14088	0.00639918	UP	0.333748	0.0101015	down	3.85489	0.00360889	UP	0.452682	0.0324487	down
BdHsfC1b	2.12682	0.0150983	UP	1.52327	0.0524865		23.8441	5.79982e-05	UP	12.4085	0.00031423	UP
BdHsfC2a	0.0561927	3.02637e-06	down	0.358137	2.37843e-06	down	0.687899	0.0141701		3.40548	0.000104369	UP
BdHsfC2b	1.47646	0.0297		2.38923	0.00179519	UP	27.3113	1.04591e-06	UP	25.1612	1.02314e-05	UP
