# Supplementary material for: Identification, expression, and functional analysis of Hsf and Hsp20 gene families in Brachypodium distachyon under heat stress
Source: PeerJ. 2021 Oct 1;9:e12267. doi: 10.7717/peerj.12267 (PMC8489411; doi:10.7717/peerj.12267)
Supplement: Supplemental Information 10 [file peerj-09-12267-s010.xls]

## Sheet: Sheet1
Plants	Samples	Number of seeds	Number of germination	Rate of germination（%）
WT	CK	102	98	96
	treatment1	109	40	38
	treatment2	109	38	36
BdHsp15.8-PX	CK	107	101	94
	treatment1	117	79	72
	treatment2	101	76	80
BdHsp17.3-CI	CK	112	100	89
	treatment1	111	63	64
	treatment2	116	66	64
BdHsp16.9-CI	CK	102	91	89
	treatment1	119	51	48
	treatment2	117	60	57
BdHsp26.4-CP	CK	103	87	84
	treatment1	109	84	91
	treatment2	106	74	83
BdHsp17.2A-CI	CK	95	93	98
	treatment1	108	66	62
	treatment2	106	62	60
BdHsp17.2B-CI	CK	105	94	89
	treatment1	107	73	76
	treatment2	120	68	63
BdHsp18-CII	CK	101	97	96
	treatment1	95	55	60
	treatment2	99	48	50
BdHsp16.4-CI	CK	105	98	93
	treatment1	107	57	57
	treatment2	101	47	50
